# Supplementary material for: ROS-Scavenging Enzymes as an Antioxidant Response to High Concentration of Anthracene in the Liverwort Marchantia polymorpha L
Source: MDPI journal article supplement (doi:10.3390/plants10071478), 2021-07-19
Supplement: s1 [file s1]

Net photosynthetic rate and chlorophyll fluorescence parameter  $F_v/F_m$  (Mean values  $\pm$ SE) determined on *M. polymorpha* in 0, 50, 100 and 280  $\mu$ M of anthracene. Net photosynthetic rate was compared with one-way ANOVA ( $p<0.05$ ) while  $F_v/F_m$  was compared using Gamma error distribution generalized linear model (GLM, Pchisq $<0.05$ ).

| Parameters                                                                       | Anthracene concentration ( $\mu$ M) |                   |                   |                   | <i>p</i> |
|----------------------------------------------------------------------------------|-------------------------------------|-------------------|-------------------|-------------------|----------|
|                                                                                  | 0                                   | 50                | 100               | 280               |          |
| Net Photosynthesis ( $\mu$ mol CO <sub>2</sub> m <sup>-2</sup> s <sup>-1</sup> ) | 4.115 $\pm$ 0.982                   | 4.245 $\pm$ 0.681 | 1.728 $\pm$ 0.519 | 2.40 $\pm$ 0.537  | 0.061    |
| $F_v/F_m$                                                                        | 0.637 $\pm$ 0.010                   | 0.606 $\pm$ 0.015 | 0.627 $\pm$ 0.009 | 0.631 $\pm$ 0.001 | 0.115    |
